# Supplementary material for: A homozygous missense variant in the alkaline phosphatase gene ALPL is associated with a severe form of canine hypophosphatasia
Source: PubMed Central journal article supplement (PMC6353930; doi:10.1038/s41598-018-37801-2), 2019-01-30
Supplement: 41598_2018_37801_MOESM1_ESM.pdf [file 41598_2018_37801_MOESM1_ESM.pdf]

## SUPPLEMENTARY MATERIAL

### **A homozygous missense variant in the alkaline phosphatase gene *ALPL* is associated with a severe form of canine hypophosphatasia**

Kaisa Kyösti<sup>1,2,3</sup>, Pernilla Syrjä<sup>1</sup>, Anu K. Lappalainen<sup>4</sup>, Meharji Arumilli<sup>1,2,3</sup>, Sruthi Hundi<sup>1,2,3</sup>,  
Veera Karkamo<sup>5</sup>, Ranno Viitmaa<sup>4</sup>, Marjo K. Hytönen<sup>1,2,3</sup>, Hannes Lohi<sup>1,2,3\*</sup>

<sup>1</sup> Department of Veterinary Biosciences, University of Helsinki, 00014 Helsinki, Finland

<sup>2</sup> Research Programs Unit, Molecular Neurology, University of Helsinki, 00014 Helsinki, Finland

<sup>3</sup> Department of Molecular Genetics, Folkhälsan Institute of Genetics, 00290 Helsinki, Finland

<sup>4</sup> Department of Equine and Small Animal Medicine, University of Helsinki, 00014 Helsinki, Finland

<sup>5</sup> Veterinary Bacteriology and Pathology Research Unit, Finnish Food Safety Authority Evira, 00790 Helsinki, Finland.

\*Corresponding author: Hannes Lohi, PhD, Professor  
Biomedicum Helsinki, Haartmaninkatu 8, P.O.Box 63  
University of Helsinki, 00014 Helsinki, Finland  
E-mail: hannes.lohi@helsinki.fi, Tel: +358 2 941 2508

## CONTENTS

**Supplementary Figure 1.** Radiographic findings in 2-week-old affected dogs.

**Supplementary Figure 2.** Conservation of the Val<sup>434</sup> position in 136 vertebrate species.

**Supplementary Table 1.** Serum biochemistry in an affected and healthy 2-week-old littermate.

**Supplementary Table 2.** Samples used in NGS variant filtering.

**Supplementary Table 3.** Prioritized homozygous variants in the affected dog.

**Supplementary Table 4.** Pathogenicity prediction results.

### **Supplementary Video Legends:**

**Supplementary Video 1.** An affected puppy at 10 weeks of age (litter 1).

**Supplementary Video 2.** An affected puppy at 2 weeks of age (litter 2).

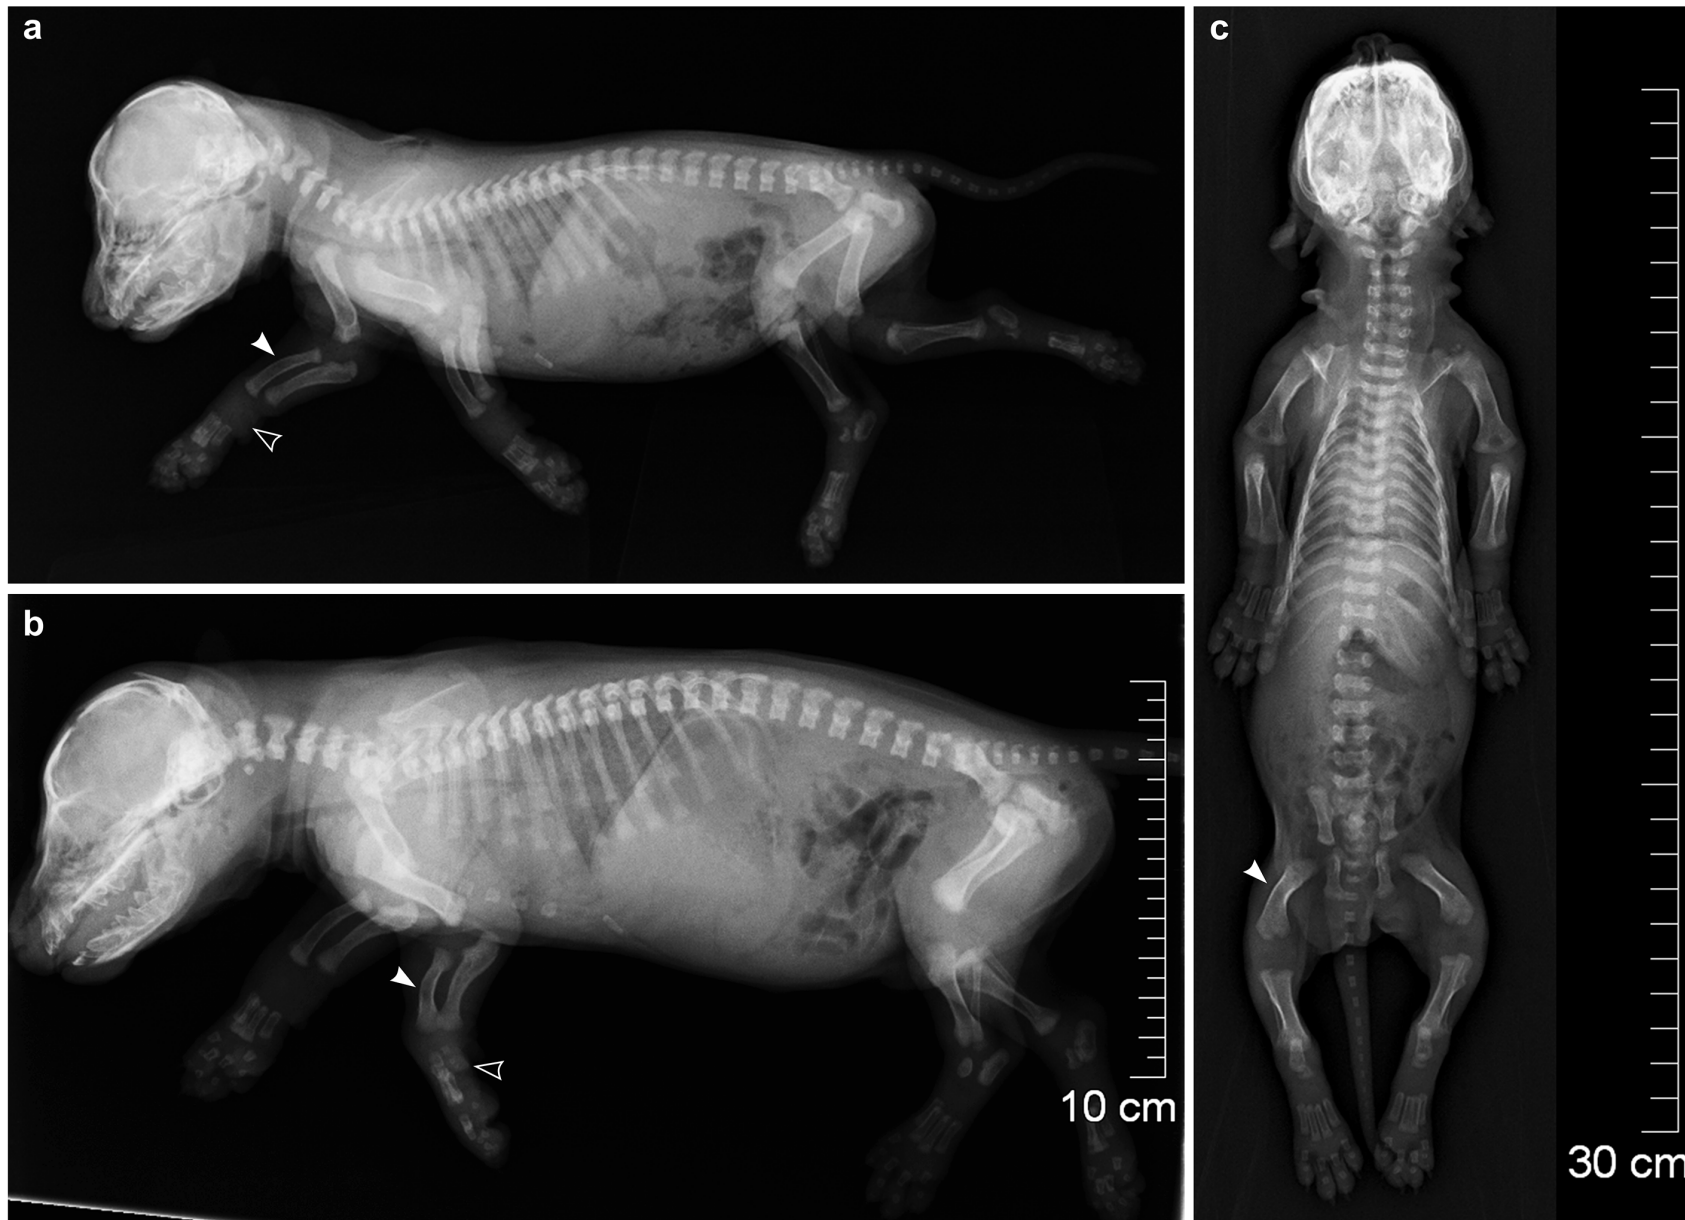

**Supplementary Figure 1. Radiographic findings in 2-week-old affected dogs. (a)** Carpal bones are non-mineralized (open arrowhead) but radius appears normal (arrowhead). **(b)** Mineralized carpal bones in one limb (open arrowhead). Radius is bowed cranially (arrowhead). **(c)** Right femur is abnormally curved (arrowhead).





**Supplementary Table 1. Serum biochemistry in an affected and healthy 2-week-old littermate.**

| <b>Metabolite</b>        | <b>Healthy puppy</b> | <b>Affected puppy</b> | <b>Reference range (adult dogs)</b> | <b>Unit</b> |
|--------------------------|----------------------|-----------------------|-------------------------------------|-------------|
| Albumin                  | 23*                  | 29                    | 25-44                               | G/L         |
| Alkaline phosphatase     | 98                   | 10*                   | 20-150                              | U/L         |
| Alanine aminotransferase | 18                   | 14                    | 10-118                              | U/L         |
| Amylase                  | 338                  | 332                   | 200-1200                            | U/L         |
| Total bilirubin          | 8                    | 4                     | 2-10                                | UMOL/L      |
| Blood urea nitrogen      | 5.7                  | 10.0*                 | 2.5-8.9                             | MMOL/L      |
| Calcium                  | 2.86                 | 3.09*                 | 2.15-2.95                           | MMOL/L      |
| Phosphorus               | 3.12*                | 3.01*                 | 0.94-2.13                           | MMOL/L      |
| Creatinine               | 35                   | 49                    | 27-124                              | UMOL/L      |
| Glucose                  | 7.6*                 | 6.9*                  | 3.3-6.1                             | MMOL/L      |
| Sodium                   | 132*                 | 138                   | 138-160                             | MMOL/L      |
| Potassium                | 5.4                  | 5.0                   | 3.7-5.8                             | MMOL/L      |
| Total protein            | 40*                  | 54*                   | 54-82                               | G/L         |
| Globulin                 | 17*                  | 24                    | 23-52                               | G/L         |

\*Out of reference range (only adult dog control ranges were available).

**Supplementary Table 2. Samples used in NGS variant filtering.**

| <b>Breed</b>                   | <b>WGS</b> | <b>WES</b> | <b>WGS + WES</b> | <b>Animals</b> |
|--------------------------------|------------|------------|------------------|----------------|
| Karelian Bear Dog, affected    |            | 1          | 1                | 1              |
| Karelian Bear Dog, unaffected* | 5          | 9          | 14               | 13             |
| Affenpinscher                  | 1          |            | 1                | 1              |
| Afghan Hound                   |            | 1          | 1                | 1              |
| Airedale Terrier               | 2          | 6          | 8                | 8              |
| Akita                          |            | 3          | 3                | 3              |
| Alaskan Husky mix              | 1          |            | 1                | 1              |
| Alaskan Malamute               | 2          | 5          | 7                | 7              |
| Alpine Dachsbracke             | 1          |            | 1                | 1              |
| American Bulldog               | 2          |            | 2                | 2              |
| American Hairless Terrier      |            | 5          | 5                | 5              |
| American Staffordshire Terrier | 1          |            | 1                | 1              |
| Australian Cattle Dog          | 5          |            | 5                | 5              |
| Australian Kelpie              | 5          | 12         | 17               | 13             |
| Australian Shepherd            | 1          |            | 1                | 1              |
| Australian Terrier             | 1          | 13         | 14               | 14             |
| Basenji                        | 6          |            | 6                | 6              |
| Basset Griffon Vendéen         | 4          |            | 4                | 4              |
| Basset Hound                   | 3          |            | 3                | 3              |
| Bavarian Hound                 | 1          |            | 1                | 1              |
| Beagle                         | 6          |            | 6                | 6              |
| Bearded Collie                 | 11         |            | 11               | 11             |
| Belgian Shepherd, gronendael   |            | 6          | 6                | 6              |
| Belgian Shepherd, malinois     | 6          | 3          | 9                | 9              |
| Belgian Shepherd, tervueren    | 2          | 7          | 9                | 9              |
| Bichon Frisé                   | 6          | 7          | 13               | 13             |
| Black Russian Terrier          | 1          |            | 1                | 1              |
| Border Collie                  | 64         | 4          | 68               | 68             |
| Border Terrier                 | 1          |            | 1                | 1              |
| Boston Terrier                 |            | 1          | 1                | 1              |
| Boxer                          | 1          | 4          | 5                | 5              |
| Bull Terrier                   | 3          |            | 3                | 3              |
| Bulldog                        |            | 1          | 1                | 1              |
| Bullmastiff                    | 2          |            | 2                | 2              |
| Cairn Terrier                  | 2          |            | 2                | 2              |
| Cane Corso                     | 5          |            | 5                | 5              |
| Cavalier King Charles Spaniel  | 3          |            | 3                | 3              |
| Central Asian Shepherd Dog     | 1          |            | 1                | 1              |
| Chihuahua                      | 3          | 2          | 5                | 5              |
| Chinese Crested Dog            | 1          |            | 1                | 1              |

| <b>Breed</b>                      | <b>WGS</b> | <b>WES</b> | <b>WGS + WES</b> | <b>Animals</b> |
|-----------------------------------|------------|------------|------------------|----------------|
| Chinese indigenous dog            | 38         |            | 38               | 38             |
| Chow Chow                         | 1          |            | 1                | 1              |
| Cocker Spaniel                    | 1          |            | 1                | 1              |
| Curly Coated Retriever            | 1          |            | 1                | 1              |
| Dachshund                         | 6          | 2          | 8                | 8              |
| Dalmatian                         | 3          | 4          | 7                | 7              |
| Dandie Dinmont Terrier            | 1          |            | 1                | 1              |
| Deerhound                         | 1          |            | 1                | 1              |
| Dobermann                         | 5          | 9          | 14               | 14             |
| Dogue de Bordeaux                 | 6          |            | 6                | 6              |
| Dutch Shepherd Dog                | 2          |            | 2                | 2              |
| Elo                               | 1          |            | 1                | 1              |
| English Cocker Spaniel            | 2          |            | 2                | 2              |
| English Springer Spaniel          |            | 1          | 1                | 1              |
| Entelbuch Cattle Dog              | 8          |            | 8                | 8              |
| Eurasier                          | 2          |            | 2                | 2              |
| Finnish Hound                     |            | 3          | 3                | 3              |
| Finnish Lapphund                  | 2          | 6          | 8                | 6              |
| Finnish Reindeer Herder           |            | 4          | 4                | 4              |
| Finnish Spitz                     |            | 9          | 9                | 9              |
| Flanders Cattle Dog               |            | 2          | 2                | 2              |
| Flat Coated Retriever             | 1          |            | 1                | 1              |
| Foxterrier                        |            | 4          | 4                | 4              |
| French Bulldog                    | 4          | 1          | 5                | 5              |
| German Hunting Terrier            | 2          |            | 2                | 2              |
| German Pinscher                   |            | 4          | 4                | 4              |
| German Pointing Dog               | 1          | 3          | 4                | 4              |
| German Shepherd Dog               | 17         | 1          | 18               | 18             |
| German Shepherd mix               | 3          |            | 3                | 3              |
| Golden Retriever                  | 8          | 3          | 11               | 11             |
| Golden Retriever mix              | 1          |            | 1                | 1              |
| Great Dane                        | 1          | 16         | 17               | 17             |
| Great Pyrenees                    | 1          |            | 1                | 1              |
| Greater Swiss Mountain Dog        | 6          |            | 6                | 6              |
| Greyhound                         | 1          |            | 1                | 1              |
| Griffon                           | 3          |            | 3                | 3              |
| Grosspitz                         | 1          |            | 1                | 1              |
| Havanese                          | 3          |            | 3                | 3              |
| Heideterrier                      | 1          |            | 1                | 1              |
| Hovawart                          | 1          |            | 1                | 1              |
| Irish Soft Coated Wheaten Terrier | 1          | 7          | 8                | 8              |
| Irish Terrier                     | 2          |            | 2                | 2              |



| Breed                              | WGS | WES | WGS + WES | Animals |
|------------------------------------|-----|-----|-----------|---------|
| Irish Wolfhound                    | 2   |     | 2         | 2       |
| Italian Greyhound                  | 2   | 1   | 3         | 3       |
| Jack Russell Terrier               | 3   |     | 3         | 3       |
| Japanese Chin                      | 1   |     | 1         | 1       |
| Kerry Blue Terrier                 | 1   |     | 1         | 1       |
| King Charles Spaniel               |     | 2   | 2         | 2       |
| Kromfohländer                      | 1   |     | 1         | 1       |
| Kuvasz                             |     | 4   | 4         | 4       |
| Labrador Retriever                 | 42  | 10  | 52        | 52      |
| Labrador Retriever mix             | 1   |     | 1         | 1       |
| Lagotto Romagnolo                  | 9   | 4   | 13        | 11      |
| Lancashire Heeler                  |     | 2   | 2         | 1       |
| Landseer                           | 2   | 2   | 4         | 4       |
| Leonberger                         | 54  | 4   | 58        | 57      |
| Miniature Bullterrier              | 1   |     | 1         | 1       |
| Miniature Schnauzer                | 25  | 2   | 27        | 27      |
| Mixed Breed                        | 1   |     | 1         | 1       |
| Newfoundland                       | 2   | 4   | 6         | 6       |
| Norfolk Terrier                    |     | 3   | 3         | 3       |
| Norwegian Elkhound, grey           |     | 2   | 2         | 2       |
| Norwegian Lundehund                |     | 1   | 1         | 1       |
| Norwich Terrier                    | 8   | 1   | 9         | 9       |
| Nova Scotia Duck Tolling Retriever | 1   |     | 1         | 1       |
| Old English Sheepdog               | 1   |     | 1         | 1       |
| Papillon                           | 3   |     | 3         | 3       |
| Parson Russell Terrier             |     | 4   | 4         | 4       |
| Pomeranian                         | 4   |     | 4         | 4       |
| Poodle                             | 22  |     | 22        | 22      |
| Portuguese Water Dog               | 3   | 2   | 5         | 5       |
| Pug                                | 20  |     | 20        | 20      |
| Pyrenean Sheepdog                  |     | 1   | 1         | 1       |
| Rhodesian Ridgeback                | 4   | 2   | 6         | 6       |
| Rottweiler                         | 2   | 3   | 5         | 5       |
| Russian Black Terrier              |     | 4   | 4         | 4       |
| Saint Bernard Dog                  | 2   |     | 2         | 2       |
| Saluki                             | 5   | 2   | 7         | 7       |
| Samoyed                            |     | 1   | 1         | 1       |
| Schnauzer                          | 1   | 5   | 6         | 6       |
| Shetland Sheepdog                  | 2   | 3   | 5         | 5       |
| Shih Tzu                           | 4   |     | 4         | 4       |
| Siberian Husky                     | 3   | 2   | 5         | 5       |
| Sloughi                            | 3   |     | 3         | 3       |

| <b>Breed</b>                       | <b>WGS</b> | <b>WES</b> | <b>WGS + WES</b> | <b>Animals</b> |
|------------------------------------|------------|------------|------------------|----------------|
| Spanish Waterdog                   | 1          |            | 1                | 1              |
| Stabyhoun                          | 5          |            | 5                | 5              |
| Staffordshire Bull Terrier         | 1          |            | 1                | 1              |
| Swedish Vallhund                   | 3          | 2          | 5                | 5              |
| Tibetan Mastiff                    | 10         | 3          | 13               | 13             |
| Tibetan Spaniel                    | 1          |            | 1                | 1              |
| Vizsla                             | 2          |            | 2                | 2              |
| Weimaraner                         | 2          |            | 2                | 2              |
| Welsh Corgi                        | 2          |            | 2                | 2              |
| Welsh Springer Spaniel             | 3          |            | 3                | 3              |
| West Highland White Terrier        | 19         | 2          | 21               | 20             |
| Whippet                            | 4          | 3          | 7                | 7              |
| White Swiss Shepherd Dog           | 3          | 2          | 5                | 5              |
| Wolf                               | 8          |            | 8                | 8              |
| Yorkshire Terrier                  | 67         |            | 67               | 67             |
| Total samples in initial filtering | 658        | 243        | 901              | 890            |
| Grand total                        | 663        | 252        | 915              | 903            |

NGS = Next generation sequencing, WGS = Whole genome sequence, WES = Whole exome sequence

\*The unaffected KBDs were excluded from initial filtering

**Supplementary Table 3. Prioritized homozygous variants in the affected dog.**

| Chr:position | REF > ALT         | Variant type               | Gene         | Gene information                                                                                       | Variant details (ref. sequence)                                |
|--------------|-------------------|----------------------------|--------------|--------------------------------------------------------------------------------------------------------|----------------------------------------------------------------|
| 1:47568351   | C > T             | splicing SNV               | SYNJ2        | Synaptojanin 2:<br>inositol polyphosphate 5-phosphatase,<br>associated to hearing loss in mice.        | c.3423+11C>T<br>(XM_014115768.2)                               |
| 1:115347272  | A > G             | nonsynonymous<br>SNV       | ZNF527       | Zinc finger protein 527:<br>unknown function.                                                          | c.430A>G; p.R144G<br>(XM_014115577.2)                          |
| 1:115788268  | C > T             | nonsynonymous<br>SNV       | LOC100687072 | ZFP30 zinc finger protein:<br>unknown function.                                                        | c.505G>A; p.G169R<br>(XM_014115673.2, low quality ref.)        |
| 1:116699524  | G ><br>GTAGTAGGCT | nonframeshift<br>insertion | LOC102155339 | IgGFC-binding protein-like:<br>unknown function.                                                       | c.4112_4113insAGCCTACTA;<br>p.G1371insGAYY<br>(XM_022406688.1) |
| 1:117146140  | G > T             | splicing SNV               | DMKN         | Dermokine: epidermal differentiation,<br>endosome trafficking, upregulated in<br>inflammatory disease. | c.693+8G>T<br>(XM_022403921.1)                                 |
| 1:117321334  | G > A             | nonsynonymous<br>SNV       | LSR          | Lipolysis stimulated lipoprotein receptor:<br>lipid metabolism, lipoprotein clearance.                 | c.1022C>T; p.P341L<br>(XM_005616718.3, partial ref.)           |
| 2:77561953   | A > C             | nonsynonymous<br>SNV       | ALPL         | Alkaline phosphatase, liver/bone/kidney:<br>mutations cause hypophosphatasia in<br>humans.             | c.1301T>G; p.V434G<br>(XM_005617214.3)                         |
| 6:7824739    | G > C             | nonsynonymous<br>SNV       | CUX1         | Cut like homeobox 1:<br>transcription factor.                                                          | c.1602C>G; p.N534K<br>(XM_005621000.3)                         |
| 14:27216415  | C > T             | nonsynonymous<br>SNV       | VWDE         | Von Willebrand factor D and EGF<br>domains: unknown function.                                          | c.4973G>A; p.G1658D<br>(XM_022427414.1)                        |
| 14:35556623  | G > A             | nonsynonymous<br>SNV       | DNAH11       | Dynein axonemal heavy chain 11:<br>mutations cause primary ciliary<br>dyskinesia in humans.            | c.5020G>A; p.G1674S<br>(XM_022427467.1, low quality ref.)      |
| 15:63661871  | G > A             | nonsynonymous<br>SNV       | DDX60        | DExD/H-box helicase 60:<br>antiviral RNA helicase.                                                     | c.4840C>T; p.H1614Y<br>(XM_532716.6)                           |
| 18:49806934  | T > G             | nonsynonymous<br>SNV       | ALDH3B1      | Aldehyde dehydrogenase 3 family<br>member B1: aldehyde detoxification.                                 | c.1094A>C; p.Y365S<br>(XM_014121253.2)                         |
| 18:55366074  | G > T             | nonsynonymous<br>SNV       | TMEM132A     | Transmembrane protein 132A:<br>unknown function.                                                       | c.1748C>A; p.P583H<br>(XM_005631694.3)                         |
| 21:32354052  | C > A             | nonsynonymous<br>SNV       | NRIP3        | Nuclear receptor interacting protein 3:<br>unknown function.                                           | c.157G>T; p.G53C<br>(XM_846198.4, low quality ref.)            |
| 25:50721076  | C > T             | nonsynonymous<br>SNV       | LOC102152569 | Uncharacterised protein model:<br>unknown function.                                                    | c.647C>T; p.P216L<br>(XM_005635935.3)                          |

REF = reference allele, ALT = alternative allele, SNV = single nucleotide variant

**Supplementary Table 4. Pathogenicity prediction results.**

| Algorithm              | Prediction      | PredictSNP expected accuracy | Score       | Patogenicity cutoff                             |
|------------------------|-----------------|------------------------------|-------------|-------------------------------------------------|
| PredictSNP consensus   | Neutral         | 0,63                         | -           | -                                               |
| PredictSNP: MAPP       | Neutral         | 0,65                         | -           | -                                               |
| PredictSNP: PhD-SNP    | Deleterious     | 0,68                         | -           | -                                               |
| PredictSNP: PolyPhen-1 | Neutral         | 0,67                         | -           | -                                               |
| PredictSNP: PolyPhen-2 | Deleterious     | 0,40                         | -           | -                                               |
| PredictSNP: SIFT       | Neutral         | 0,68                         | -           | -                                               |
| PredictSNP: SNAP       | Neutral         | 0,58                         | -           | -                                               |
| PredictSNP: PANTHER    | Deleterious     | 0,65                         | -           | -                                               |
| PROVEAN                | Neutral         | -                            | -2.446      | <= -2.5                                         |
| MutationTaster2*       | Disease causing | -                            | 0,999999992 | 1 is highest probability of accurate prediction |

\*The Mutation Taster2 algorithm was used with a human *ALPL* reference (NM\_000478.5, NP\_000469.3), and the other algorithms with the canine reference ((XM\_005617214.3, XP\_005617271.1)

**Supplementary Video Legends**

**Supplementary Video 1. An affected puppy at 10 weeks of age (litter 1).** The puppy is walking in a crouched position and showing both plantigrade and digitigrade gait (metatarsals and metacarpals on the ground).

**Supplementary Video 2. An affected puppy at 2 weeks of age (litter 2).** The affected puppy is having a seizure.
